# Supplementary material for: Modulation of terahertz absorption by a single mutation of rhodopsin mimics
Source: Royal Society of Chemistry journal article supplement (doi:10.1039/d4cp04411h), 2025-01-01
Supplement: d4cp04411h8.pdf [file d4cp04411h8.pdf]

# PROTEIN R1

| Absorption Frequency without Binding | Utmost Vibration area (Directions included)                                         | Absorption Frequency with Binding | Utmost Vibration area (Directions included)                                         |
|--------------------------------------|-------------------------------------------------------------------------------------|-----------------------------------|-------------------------------------------------------------------------------------|
| 8.8/cm                               | 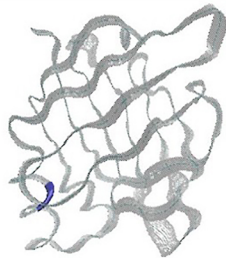   | 7.9/cm                            |    |
| 13.7/cm                              |    | 13.2/cm                           |    |
| 35.4/cm                              |   | 35.0/cm                           |   |
| 56.8/cm                              |  | 55.6/cm                           |  |
| 65.2/cm                              |  | 67.8/cm                           |  |
