# Supplementary material for: Modulation of terahertz absorption by a single mutation of rhodopsin mimics
Source: Royal Society of Chemistry journal article supplement (doi:10.1039/d4cp04411h), 2025-01-01
Supplement: d4cp04411h9.pdf [file d4cp04411h9.pdf]

# PROTEIN R2

| Absorption Frequency without Binding | Utmost Vibration area (Directions included)                                         | Absorption Frequency with Binding | Utmost Vibration area (Directions included)                                         |
|--------------------------------------|-------------------------------------------------------------------------------------|-----------------------------------|-------------------------------------------------------------------------------------|
| 7.5/cm                               |    | 7.6/cm                            |    |
| 11.9/cm                              |    | 12.5/cm                           |    |
| 40.6/cm                              |    | 40.3/cm                           |    |
| 58.9/cm                              |   | 59.4/cm                           |   |
| 68.8/cm                              |  | 66.9/cm                           |  |
