# Supplementary figures and images for: Modulation of terahertz absorption by a single mutation of rhodopsin mimics
Source: Royal Society of Chemistry journal article supplement (doi:10.1039/d4cp04411h), 2025-01-01

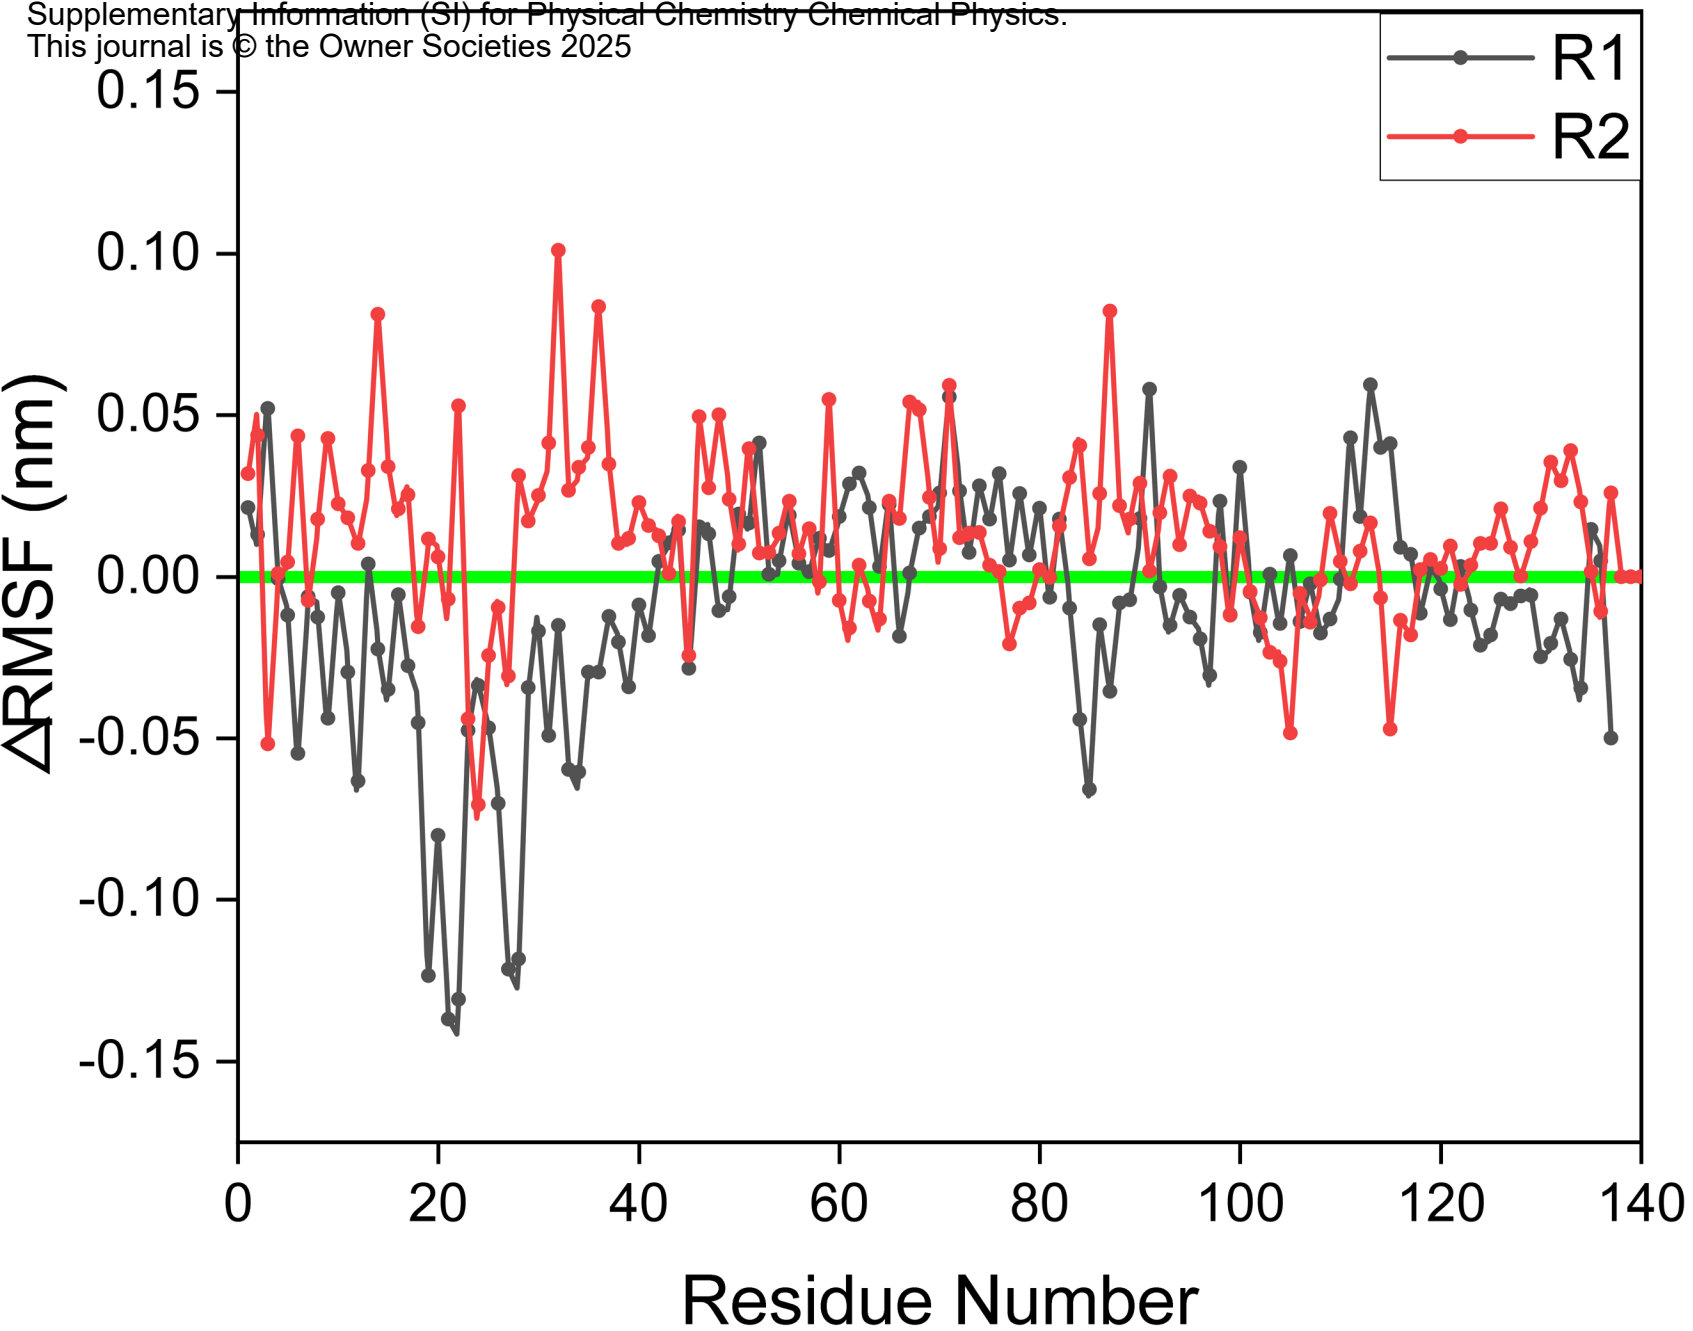

Supplement: d4cp04411h10.pdf [file d4cp04411h10.pdf]

a.

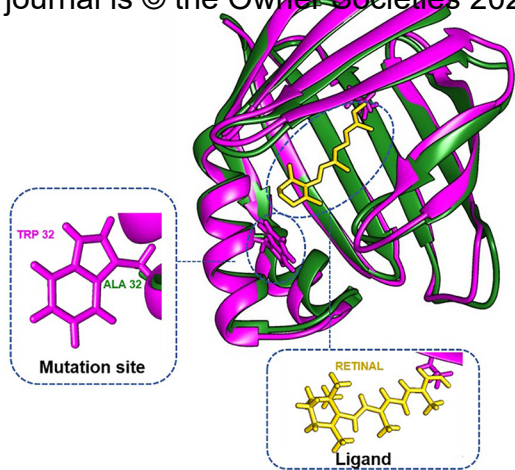

b.

Protein purity  
testing

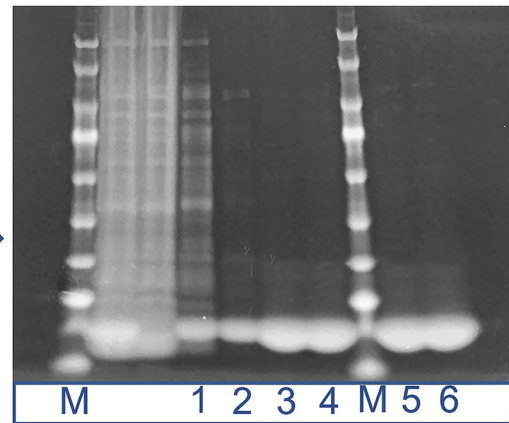

Sample Making

c.

Experiment  
results

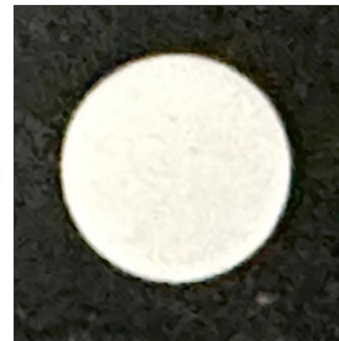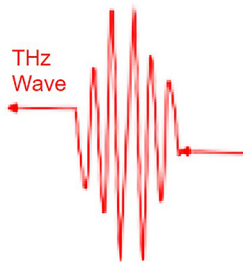

Supplement: d4cp04411h3.pdf [file d4cp04411h3.pdf]
